# Supplementary material for: CO2 hydrogenation by phosphorus–nitrogen PN3P-pincer iridium hydride complexes: elucidation of the deactivation pathway
Source: Royal Society of Chemistry journal article supplement (doi:10.1039/c9dt01319a), 2019-01-01
Supplement: c9dt01319a1.pdf [file c9dt01319a1.pdf]

## Supporting Information

### CO<sub>2</sub> Hydrogenation by Phosphorus–Nitrogen PN<sup>3</sup>P-Pincer Iridium Hydride

#### Complexes: Elucidation of the Deactivation Pathway

Yupeng Pan,<sup>a,b</sup> Chao Guan,<sup>a</sup> Huaifeng Li,<sup>a</sup> Priyanka Chakraborty,<sup>a</sup> Chunhui Zhou<sup>a</sup> and Kuo-Wei Huang<sup>\*a</sup>

<sup>a</sup>KAUST Catalysis Center and Division of Physical Sciences and Engineering, King Abdullah University of Science and Technology (KAUST), Thuwal 23955-6900, Saudi Arabia

<sup>b</sup>Shenzhen Grubbs Institute, Southern University of Science and Technology (SUSTech), Shenzhen, 518055, P. R. China

### Electronic Supporting Information

#### Table of Contents

|                                                               |        |
|---------------------------------------------------------------|--------|
| 1 General Methods and Materials .....                         | S2     |
| 2 General Procedure for Hydrogenation of Carbon Dioxide ..... | S3     |
| 3 X-ray Crystallographic Studies .....                        | S3     |
| 4 Characterization of Compounds.....                          | S4-S7  |
| 5 References.....                                             | S8     |
| 6 NMR Spectra.....                                            | S9-S18 |

## 1 General Methods and Materials

All reactions were carried out under a dry and oxygen-free argon atmosphere by using Schlenk techniques or under a nitrogen atmosphere in an MBraun glovebox. Chemicals were purchased from commercial sources and used without purification, unless otherwise noted. All the solvents used for reactions were distilled under argon after drying over an appropriate drying agent or being passed through solvent-purification columns.  $^1\text{H}$  and  $^{13}\text{C}$  NMR spectra were recorded on a Bruker 400 MHz, 500 MHz or 600 MHz, spectrometer at 400 MHz and 100 MHz, 500 MHz and 125 MHz, or 600 MHz and 150 MHz, respectively. All chemical shifts were reported in  $\delta$  units with references to the residual solvent resonance of the deuterated solvents for proton and carbon chemical shifts, and to external  $\text{H}_3\text{PO}_4$  (85%) for phosphorus chemical shifts. Elemental analyses were carried out on a Flash 2000 elemental analyzer. HRMS data were performed on a Finnigan MAT 95 system. The X-ray diffraction data were collected using Bruker-AXS KAPPA-APEXII CCD diffractometer.

Safety Warning! Highly concentrated  $\text{CO}_2$  are potentially hazardous and can undergo violent asphyxia upon high pressure. Highly concentrated  $\text{H}_2$  are potentially flammable. The CO gas detector was used when CO is employed in the reaction process. Reactions and subsequent operations involving  $\text{H}_2$  and  $\text{CO}_2$  should be run behind a safety shield in fumehood. All hazardous materials should be handled in accordance with the standard procedure.

## 2 General Procedure for Hydrogenation of Carbon Dioxide

Catalyst (10  $\mu\text{mol}$ ) was dissolved in THF (10 mL), and diluted to 0.05 mmol/L. The catalyst solution (2 mL  $\times$  0.05 mol/L) and degassed KOH aqueous solution (2 mL  $\times$  0.50 mmol/L) were added to a 50 mL stainless autoclave, charged, and pressurized first by  $\text{CO}_2$  and then by  $\text{H}_2$  until the  $\text{CO}_2/\text{H}_2$  ratio is 1/1. The reaction mixture was stirred at an appropriate temperature for an appropriate period of time. Sodium 3-(trimethylsilyl)-1-propanesulfonate (8.96 mg, 0.041 mmol) was added to the reaction mixture as an internal standard, and an aliquot of the mixture was dissolved in  $\text{D}_2\text{O}$  to estimate yield using the  $^1\text{H}$  NMR spectrum. Each reaction was repeated twice to confirm the reproducibility.<sup>1</sup>

## 3 X-ray Crystallographic Studies

Crystals for X-ray analysis were obtained as described in the preparations. The crystals were manipulated in a glovebox. Data collections were performed Bruker-AXS KAPPA-APEXII CCD diffractometer ( $\text{Cu K}\alpha$ ,  $\lambda = 1.5406 \text{ \AA}$ ). Indexing was performed using APEX2 (Difference Vectors method). The determination of crystal class and unit cell parameters was carried out by the SMART program package. The raw frame data were processed using SAINT and SADABS<sup>2</sup> to yield the reflection data file. The structures were solved by using the SHELXTL program. Refinement was performed on  $F^2$  anisotropically for all non-hydrogen atoms by the full-matrix least-squares method.<sup>3-4</sup> Hydrogen atoms were placed at the calculated positions and were included in the structure calculation without further refinement of the parameters. Platon programme (embedded in Olex-2 software)<sup>5</sup> has been used for squeezing the solvent peaks.<sup>6</sup>

## 4 Characterization of Compounds

### 4.1 Synthesis and Characterization of Compound **2b** [PN<sup>3</sup>P<sup>tBu</sup>IrH<sub>2</sub>Cl] and **2a** [PN<sup>3</sup>P<sup>cPe</sup>IrH<sub>2</sub>Cl]

Following the known synthetic route, Compound **1a** and **1b** were synthesized.<sup>7</sup> Compound **2b** was obtained under the reaction of **1b** (36.6 mg, 0.05 mmol) with 300 psi pressurized H<sub>2</sub>. To the 50 mL stainless autoclave, the THF suspension of compound **1b** (36.6 mg, 0.05 mmol) was charged and pressurized by H<sub>2</sub> up to 300 psi. The reaction mixture was stirred at 80 °C for 12h. Then the solvent was removed under vacuum to obtain a red solid. The residue was washed with hexane (3 × 1 mL) and dried under vacuum to give compound **2b** as a red solid (23 mg, 74% yield). Single crystal of **2b** suitable for X-ray diffraction analysis was grown from THF/CH<sub>2</sub>Cl<sub>2</sub> solutions at -30°C. The analogous compound **2a** was also synthesized according the same procedure. For **2b**, <sup>1</sup>H NMR (500 MHz, CDCl<sub>3</sub>, 25 °C) δ 9.79 (br, 2H, -NH<sub>2</sub>), 7.17 (br, 2H, -py), 6.92 (t, *J* = 10.0 Hz, 1H, -py), 1.36 (t, *J* = 10.0 Hz, 36H, -<sup>t</sup>Bu), 0 (TMS), -26.87 (br, 2H, -hydride), <sup>13</sup>C NMR (125 MHz, CDCl<sub>3</sub>, 25 °C): δ 163.9 (-py), 140.4 (-py), 99.2 (-py), 39.5 (t, *J* = 13.8 Hz, -<sup>t</sup>Bu), 28.9 (-<sup>t</sup>Bu). <sup>31</sup>P NMR (243 MHz, CDCl<sub>3</sub>, 25 °C): δ 126.18. Anal. Calc. for C<sub>21</sub>H<sub>43</sub>N<sub>3</sub>P<sub>2</sub>IrCl: C, 40.21; H, 6.91; N, 6.70. Found: C, 40.15; H, 7.13; N, 6.61. MS *m/z*(ESI) Calcd. for C<sub>21</sub>H<sub>43</sub>N<sub>3</sub>P<sub>2</sub>IrCl requires [M-Cl]<sup>+</sup> 592.2561, Found: 592.2547. For **2a**, <sup>1</sup>H NMR(600 MHz, CDCl<sub>3</sub>, 25 °C) δ 7.16 (t, *J* = 6.0 Hz, 1H, -py), 6.12 (d, *J* = 6.0 Hz, 2H, -py), 5.31 (br, 2H, -NH<sub>2</sub>), 3.23 (br, 2H, -cPe), 2.35 (br, 2H, -cPe), 2.17 (br, 2H, -cPe), 2.00 (br, 2H, -cPe), 1.52–1.82 (m, 28H, -cPe), -16.93 (br, 1H, -IrH), -23.62 (br, 1H, -IrH). <sup>13</sup>C NMR (125 MHz, CDCl<sub>3</sub>, 25 °C): δ 158.9 (t, *J* = 6.3 Hz, -py), 137.8 (-py), 96.9 (-py), 37.9 (t, *J* = 17.5 Hz, -cPe), 37.6(-cPe), 34.3 (-cPe), 26.2 (-cPe), 22.6 (-cPe). <sup>31</sup>P NMR (243 MHz, CDCl<sub>3</sub>, 25 °C): δ 94.54. Anal.

Calc. for  $C_{25}H_{43}N_3P_2IrCl$ : C, 44.47; H, 6.42; N, 6.22. Found: C, 45.16; H, 6.67; N, 6.12. MS  $m/z$  (ESI)

Calcd. for  $C_{25}H_{43}N_3P_2IrCl$  requires  $[M-Cl]^+$  640.2561, Found: 640.2547.

#### 4.2 Synthesis and Characterization of Compound **3b** [ $PN^3P^{tBu}IrH_2$ ]

Under argon,  $KOtBu$  (56 mg, 0.5 mmol) was added to a suspension of **2b** (313.6 mg, 0.5 mmol) in THF (4 mL). The mixture was stirred at room temperature for 2 h. The red solid **3b**, thus obtained, was filtered and washed with cold pentane (3×3 mL), then dried under vacuum (303.1 mg, 82% yield). Single crystal of **3b** suitable for X-ray diffraction analysis was grown from THF/Et<sub>2</sub>O solutions at -30 °C. The analogous compound **3a** was also synthesized using **2a** according the same procedure. For **3b**,  $^1H$  NMR (600 MHz,  $C_6D_6$ , 25 °C)  $\delta$  6.92(t,  $J$  = 12.0 Hz, 1H, -Py), 6.83(d,  $J$  = 12.0 Hz, 1H, -Py), 5.21(d,  $J$  = 6.0 Hz, 1H, -Py), 4.76 (s, 1H, -NH), 1.45 (d,  $J$  = 12.0 Hz, 18H, - $tBu$ ), 1.01 (d,  $J$  = 12.0 Hz, 18H, - $tBu$ ), -24.93(dd,  $J$  = 12.0 Hz, 2H, -IrH).  $^{13}C$  NMR (125 MHz,  $C_6D_6$ , 25 °C): 176.9 (d,  $J$  = 7.3 Hz, -Py), 162.2 (t,  $J$  = 7.3 Hz, -Py), 139.9 (t,  $J$  = 7.3 Hz, -Py), 106.1 (d,  $J$  = 19.3 Hz, -Py), 84.8 (d,  $J$  = 6.5 Hz, -Py), 38.8 (dd,  $J_1$  = 7.0 Hz,  $J_2$  = 28.9 Hz, - $tBu$ ), 38.2 (dd,  $J_1$  = 4.6 Hz,  $J_2$  = 17.8 Hz, - $tBu$ ), 29.4 (d,  $J$  = 4.2 Hz, - $tBu$ ), 28.6 (d,  $J$  = 6.2 Hz, - $tBu$ ).  $^{31}P$  NMR (162 MHz,  $C_6D_6$ , 25 °C):  $\delta$  122.36 (d,  $J_{P-P}$  = 299.2 Hz), 119.93(d,  $J_{P-P}$  = 299.3 Hz). Anal. Calc. for  $C_{21}H_{42}N_3P_2Ir$ : C, 42.70; H, 7.17; N, 7.11. Found: C, 42.87; H, 6.93; N, 6.91. MS (ESI) Calcd. for  $C_{21}H_{42}N_3P_2Ir$  requires  $[M+H]^+$  592.2556, Found: 592.2550.

### 4.3 Synthesis and Characterization of Compound **4a** [PN<sup>3</sup>P<sup>cPe</sup>IrH<sub>3</sub>]

Compound **3a** was dissolved in THF, then the solution was transferred into the 50 mL stainless autoclave, charged, and pressurized with H<sub>2</sub> up to 300 psi. The reaction mixture was stirred at 80 °C for 12 h. The gray solid, thus obtained, was filtered and washed with pentane (3×3 mL), then dried under vacuum to give compound **4a** as a light gray solid (179 mg, 56% yield). Single crystal of **4a** suitable for X-ray diffraction analysis was grown from THF solutions at -30 °C. For **4a**, <sup>1</sup>H NMR (600 MHz, C<sub>6</sub>D<sub>6</sub>, 25 °C): δ 6.81 (t, *J* = 12.0 Hz, 1H, -Py ), 5.60 (d, *J* = 12.0 Hz, 2H, -Py), 4.47 (br, 2H, -NH<sub>2</sub>), 3.57 (thf), 1.40 (thf), 1.31-2.15 (m, 36H, cPe), 0 (TMS ), -11.76 (dt, *J*<sub>H-H</sub> = 6.0 Hz, *J*<sub>P-H</sub> = 25.5 Hz, 2H, -IrH), -18.15 (m, *J*<sub>P-H</sub> = 12.0 Hz, 1H, -IrH), <sup>13</sup>C NMR (125 MHz, C<sub>6</sub>D<sub>6</sub>, 25 °C): δ 159.4 (t, *J* = 6.3 Hz, -Py), 134.7(-py), 95.3(-py), 68.2 (thf), 43.8 (t, *J* = 18.8 Hz, -cPe), 31.3 (t, *J* = 6.3 Hz, -cPe), 29.7 (-cPe), 27.8 (t, *J* = 6.0 Hz, -cPe), 26.9 (t, *J* = 3.8 Hz, -cPe), 26.1(thf). <sup>31</sup>P NMR (243 MHz, C<sub>6</sub>D<sub>6</sub>, 25 °C): δ 114.23. Anal. Calc. for C<sub>25</sub>H<sub>44</sub>N<sub>3</sub>P<sub>2</sub>Ir•3THF: C, 51.85; H, 8.00; N, 4.90. Found: C, 51.44; H, 7.82; N, 5.09. MS *m/z* (ESI) Calcd. for C<sub>25</sub>H<sub>44</sub>N<sub>3</sub>P<sub>2</sub>Ir requires [M-H]<sup>+</sup> 640.2561, Found: 640.2548.

### 4.4 Synthesis and Characterization of Compound **4b** [PN<sup>3</sup>P<sup>tBu</sup>IrH<sub>3</sub>]

Following the procedure described for **4a**, compound **3b** (29.5 mg, 0.05 mmol) was also reacted with H<sub>2</sub> (300 psi) in THF to yield compound **4b** as a yellow solid (25.2 mg, 85% yield). For **4b**, <sup>1</sup>H NMR (400 MHz, C<sub>6</sub>D<sub>6</sub>, 25 °C): δ 6.78 (t, *J* = 8.0 Hz, 1H, -Py ), 5.60 (d, *J* = 8.0 Hz, 2H, -Py), 4.89 (br, 2H, -NH<sub>2</sub>), 1.42 (t, *J* = 16.0 Hz, 36H, -<sup>t</sup>Bu), -10.89 (dt, *J*<sub>H-H</sub> = 4.0 Hz, *J*<sub>P-H</sub> = 17.0 Hz, 2H, -IrH), -17.36 (m, *J*<sub>P-H</sub> = 16.0 Hz, 1H, -IrH), <sup>13</sup>C NMR (100 MHz, C<sub>6</sub>D<sub>6</sub>, 25 °C): δ 159.7 (t, *J* = 6.0 Hz, -Py), 134.6 (-Py), 95.9 (-Py), 37.9 (t, *J* = 12.2 Hz, -<sup>t</sup>Bu), 29.9 (-<sup>t</sup>Bu). <sup>31</sup>P NMR (162 MHz, C<sub>6</sub>D<sub>6</sub>, 25 °C): δ 123.80.

Anal. Calc. for  $C_{21}H_{44}N_3P_2Ir$ : C, 42.55; H, 7.48; N, 7.09. Found: C, 42.88; H, 7.05; N, 6.71. MS  $m/z$ (ESI)

Calcd. for  $C_{21}H_{44}N_3P_2Ir$  requires  $[M-H]^+$  592.2561, Found: 592.2550.

#### 4.5 Reaction of Compound **4b** $[PN^3P^{tBu}IrH_3]$ with $CO_2$ and $H_2$ Formation of Compound **5b** $[PN^3P^{tBu}IrCO]$

A THF solution (5 mL) of **4b** (17.7 mg, 0.03 mmol) was loaded into the 50 mL stainless autoclave, charged, and pressurized with  $CO_2$  and  $H_2$  (1:1, 120 psi), and stirred at 140 °C for 24 hours afforded **5b** in 78% yield after recrystallization. Single crystals of **5b** suitable for X-ray diffraction analysis was grown from THF solutions at room temperature. For **5b**,  $^1H$  NMR (400 MHz,  $C_6D_6$ , 25 °C)  $\delta$  6.83(t,  $J$  = 8.0 Hz, 1H, -Py), 6.74(d,  $J$  = 8.0 Hz, 1H, -Py), 5.11 (d,  $J$  = 8.0 Hz, 1H, -Py), 4.60 (s, 1H, -NH), 1.51 (d,  $J$  = 12.0 Hz, 18H,  $-tBu$ ), 1.04 (d,  $J$  = 16.0 Hz, 18H,  $-tBu$ ).  $^{13}C$  NMR (125 MHz,  $C_6D_6$ , 25 °C): 190.7 (t,  $J$  = 6.2 Hz, -IrCO), 176.0 (t,  $J$  = 8.7 Hz, -Py), 161.4 (t,  $J$  = 7.5 Hz, -Py), 139.0 (-Py), 105.8 (d,  $J$  = 21.2 Hz, -Py), 85.7 (d,  $J$  = 7.5 Hz, -Py), 39.9 (dd,  $J_1$  = 6.2 Hz,  $J_2$  = 12.5 Hz,  $-tBu$ ), 39.4 (dd,  $J_1$  = 3.7 Hz,  $J_2$  = 17.5 Hz,  $-tBu$ ), 29.3 (dd,  $J_1$  = 3.7 Hz,  $J_2$  = 25.0 Hz,  $-tBu$ ), 28.5 (dd,  $J_1$  = 3.7 Hz,  $J_2$  = 12.0 Hz,  $-tBu$ ).  $^{31}P$  NMR (162 MHz,  $C_6D_6$ , 25 °C): 119.83 (d,  $J_{P-P}$  = 252.7 Hz), 117.29 (d,  $J_{P-P}$  = 252.7 Hz). Anal. Calc. for  $C_{22}H_{40}N_3P_2OIr$ : C, 43.91; H, 6.87; N, 6.98. Found: C, 43.53; H, 7.13; N, 6.64. MS  $m/z$ (ESI) Calcd. for  $C_{22}H_{40}N_3P_2OIr$  requires  $[M+H]^+$  618.2349, Found: 618.2344. IR ( $cm^{-1}$ ): 1940 ( $\nu_{CO}$ ).

## 5 Reference

1. R. Tanaka, M. Yamashita, K. Nozaki, J. Am. Chem. Soc., 2009, **131**, 14168.
2. L. Krause, R. Herbst-Irmer, G. M. Sheldrick, D. J. Stalke, Appl. Crystallogr. 2015, **48**, 3.
3. G.M. Sheldrick Crystal structure refinement with SHELXL. Acta Crystallographica, Acta Crystallogr. C 2015, **71**, 3.
4. APEX2, SMART, SAINT & SADABS; Bruker, AXS Inc.: Madison, Wisconsin, USA. 2012.
5. O. V. Dolomanov, L. J. Bourhis, R. J. Gildea, J. A. Howard and H. Puschmann OLEX2: a complete structure solution, refinement and analysis program. J Appl Crystallogr 2009, **42**, 339.
6. A.L. Spek, PLATON, A Multipurpose Crystallographic Tool, Utrecht University, Utrecht, 2008.
7. L. Guo, Y. Liu, W. Yao, X. Leng, Z. Huang, Org. Lett., 2013, **15**, 1144.



## 6 NMR spectra

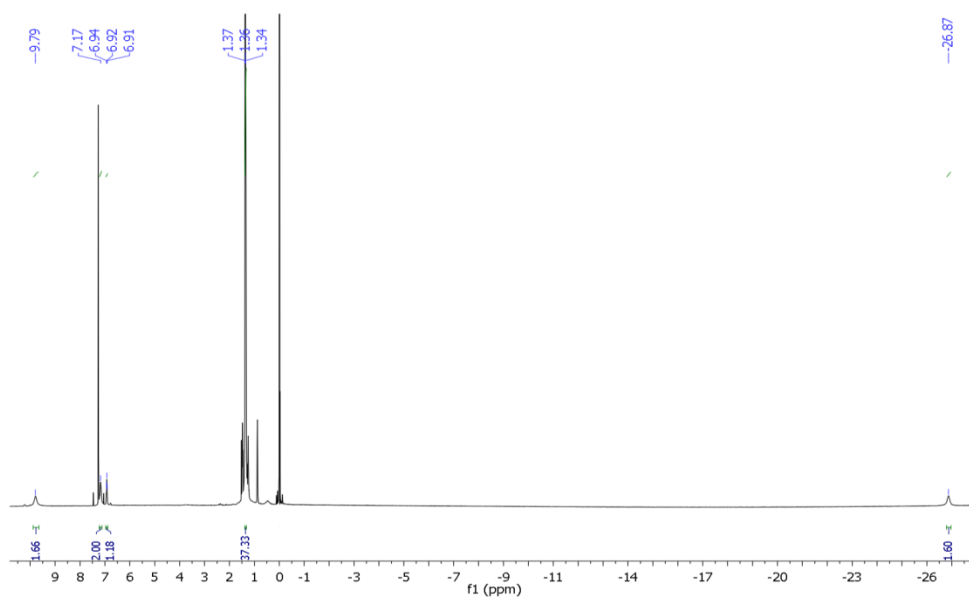

**Fig. 1.**  $^1\text{H}$  NMR spectrum of **2b** [ $\text{PN}^3\text{Pt}^{\text{tBu}}\text{IrH}_2\text{Cl}$ ] (500 MHz,  $\text{CDCl}_3$ , 25 °C).

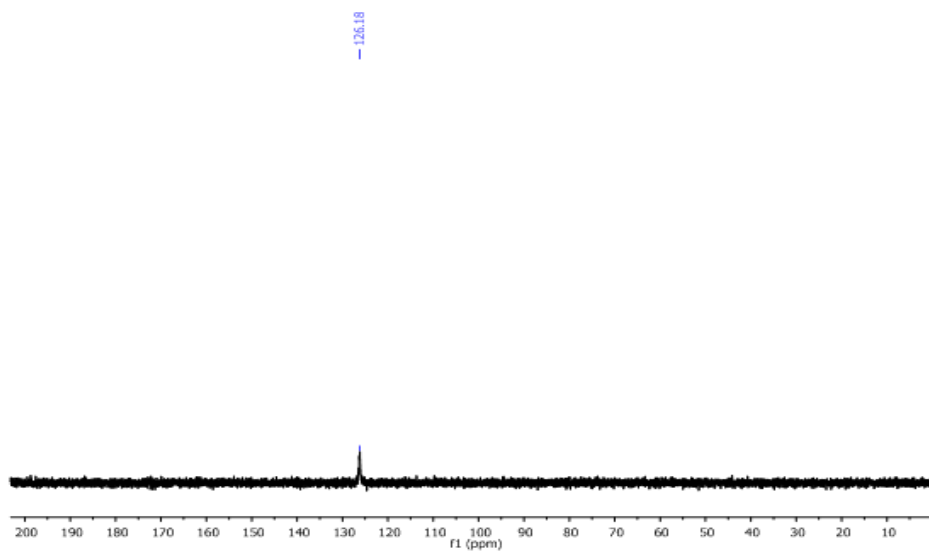

**Fig. 2.**  $^{31}\text{P}$  NMR spectrum of **2b** [ $\text{PN}^3\text{Pt}^{\text{tBu}}\text{IrH}_2\text{Cl}$ ] (243 MHz,  $\text{CDCl}_3$ , 25 °C).

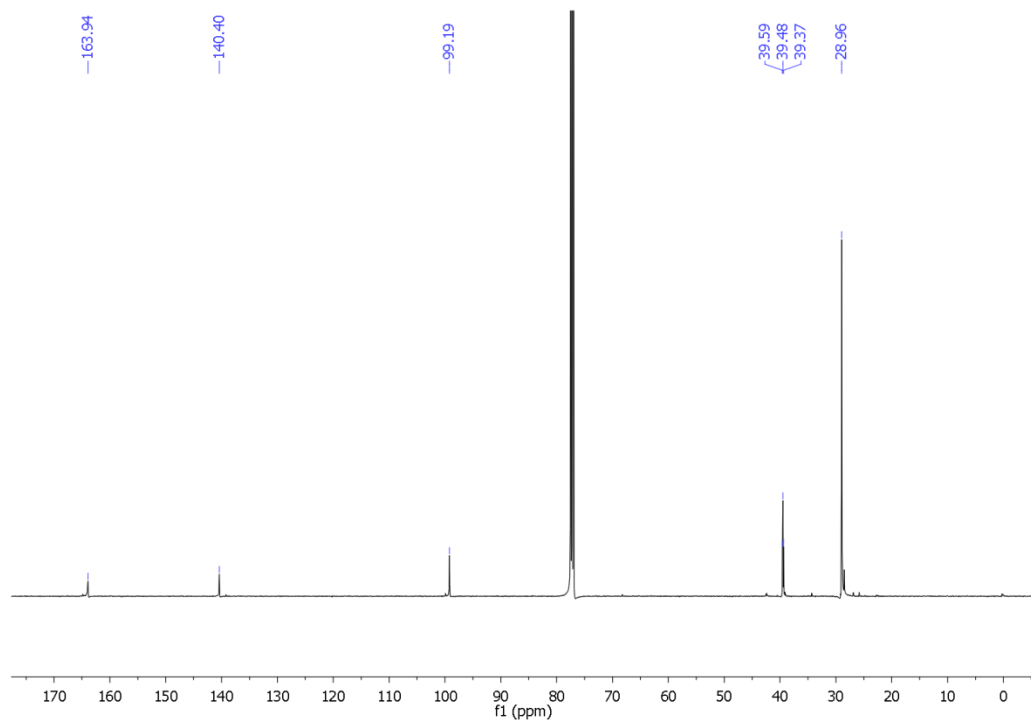

**Fig. 3.**  $^{13}\text{C}$  NMR spectrum of **2b** [ $\text{PN}^3\text{P}^{\text{tBu}}\text{IrH}_2\text{Cl}$ ] (125 MHz,  $\text{CDCl}_3$ , 25 °C).

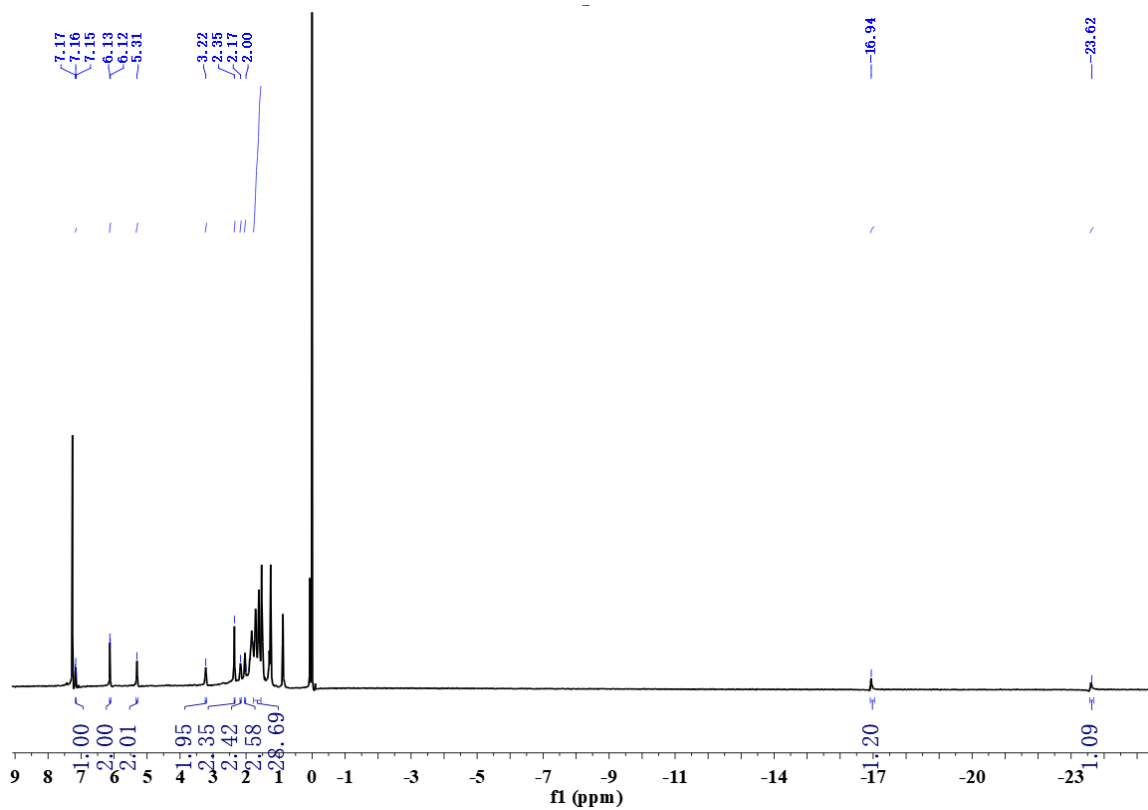

**Fig. 4.**  $^1\text{H}$  NMR spectrum of **2a** [ $\text{PN}^3\text{P}^{\text{cPe}}\text{IrH}_2\text{Cl}$ ] (600 MHz,  $\text{CDCl}_3$ , 25 °C).

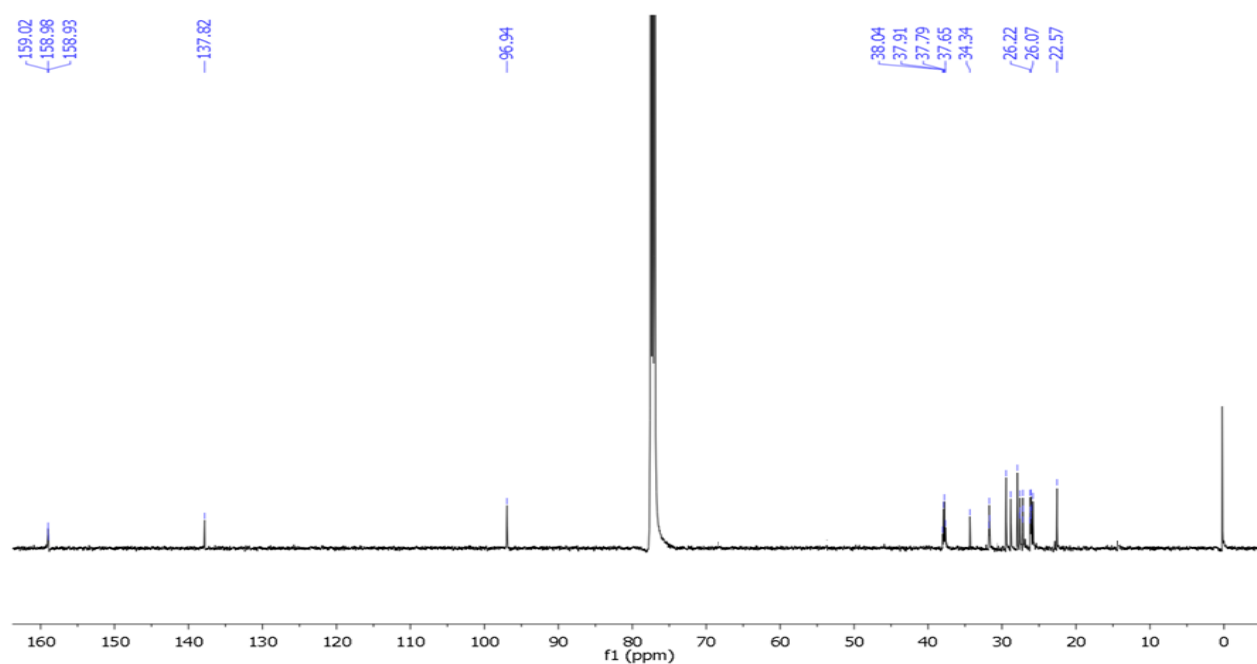

**Fig. 5.**  $^{13}\text{C}$  NMR spectrum of **2a** [ $\text{PN}^3\text{P}^{\text{cPe}}\text{IrH}_2\text{Cl}$ ] (125 MHz,  $\text{CDCl}_3$ , 25 °C).

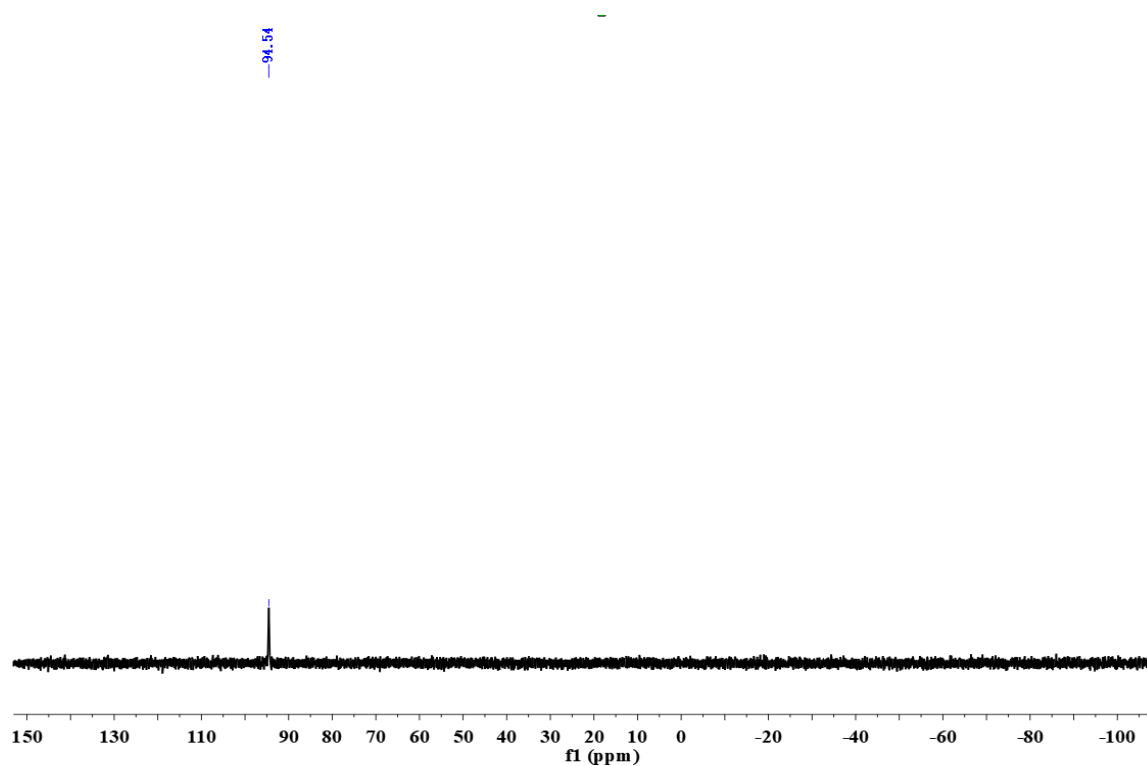

**Fig. 6.**  $^{31}\text{P}$  NMR spectrum of **2a** [ $\text{PN}^3\text{P}^{\text{cPe}}\text{IrH}_2\text{Cl}$ ] (243 MHz,  $\text{CDCl}_3$ , 25 °C).

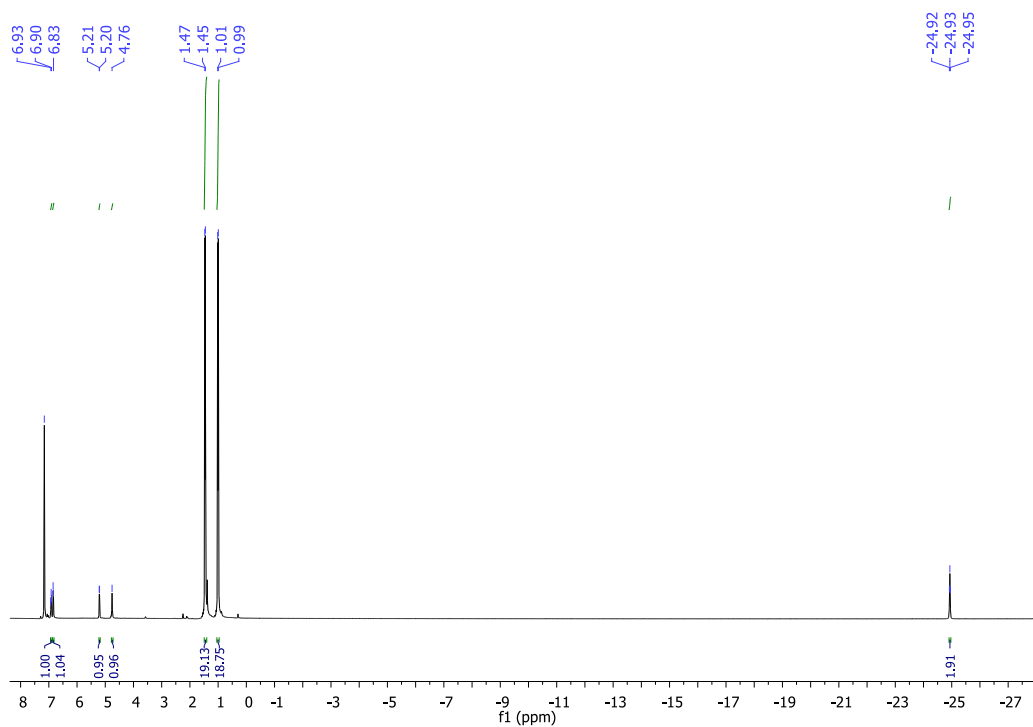

**Fig. 7.** <sup>1</sup>H NMR spectrum of **3b** [PN<sup>3</sup>P<sup>t</sup>BuIrH<sub>2</sub>] (600 MHz, C<sub>6</sub>D<sub>6</sub>, 25 °C).

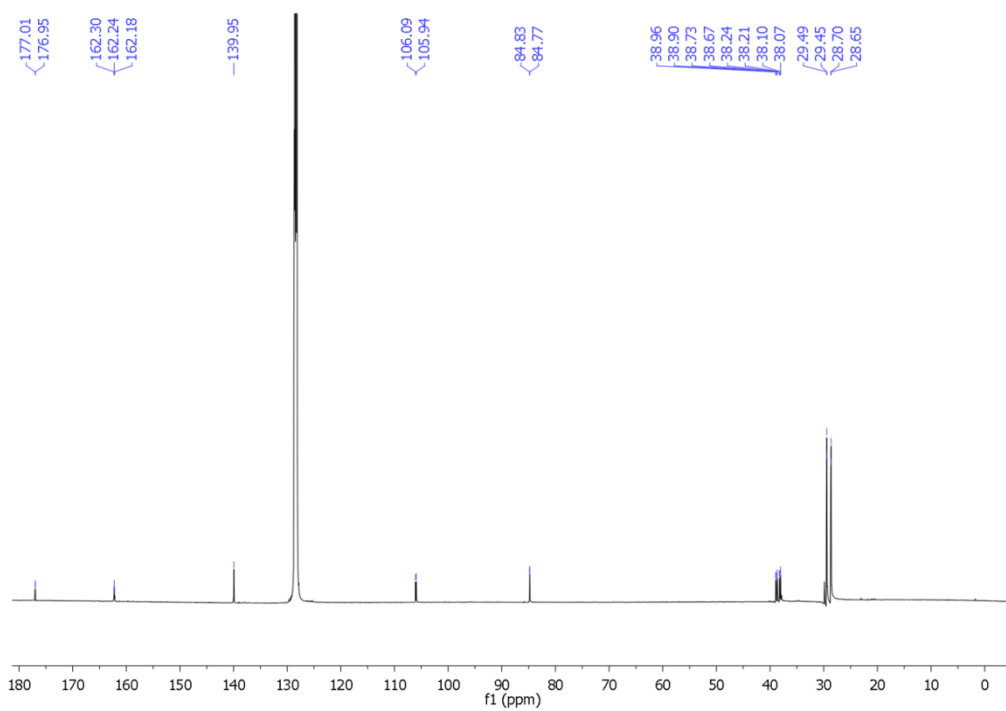

**Fig. 8.** <sup>13</sup>C NMR spectrum of **3b** [PN<sup>3</sup>P<sup>t</sup>BuIrH<sub>2</sub>] (125 MHz, C<sub>6</sub>D<sub>6</sub>, 25 °C).

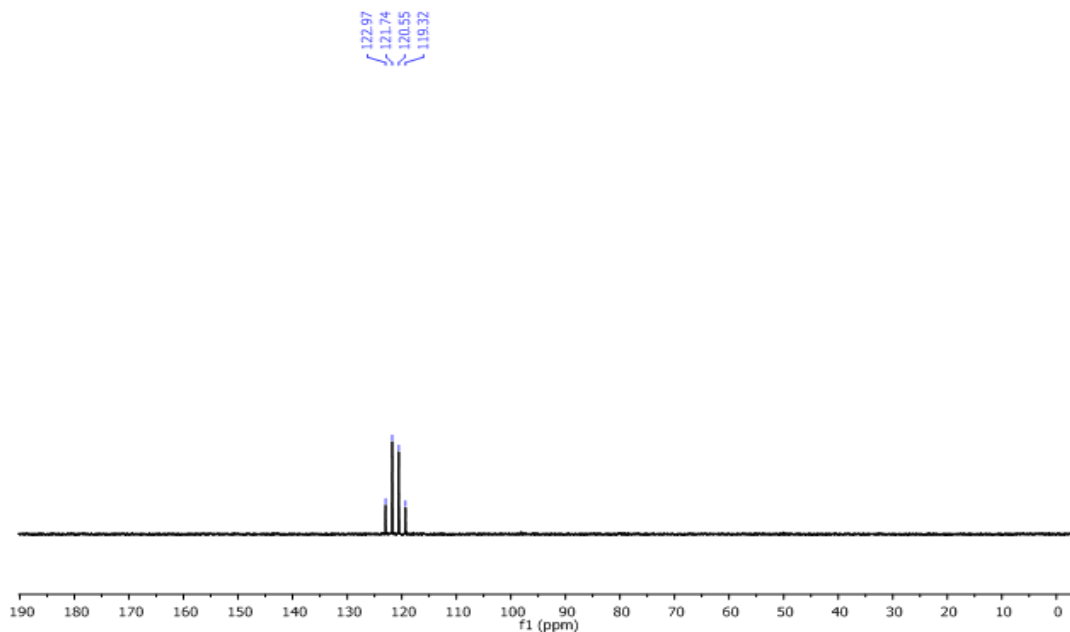

**Fig. 9.**  $^{31}\text{P}$  NMR spectrum of **3b** [ $\text{PN}^3\text{P}^t\text{BuIrH}_2$ ] (162 MHz,  $\text{C}_6\text{D}_6$ , 25 °C).

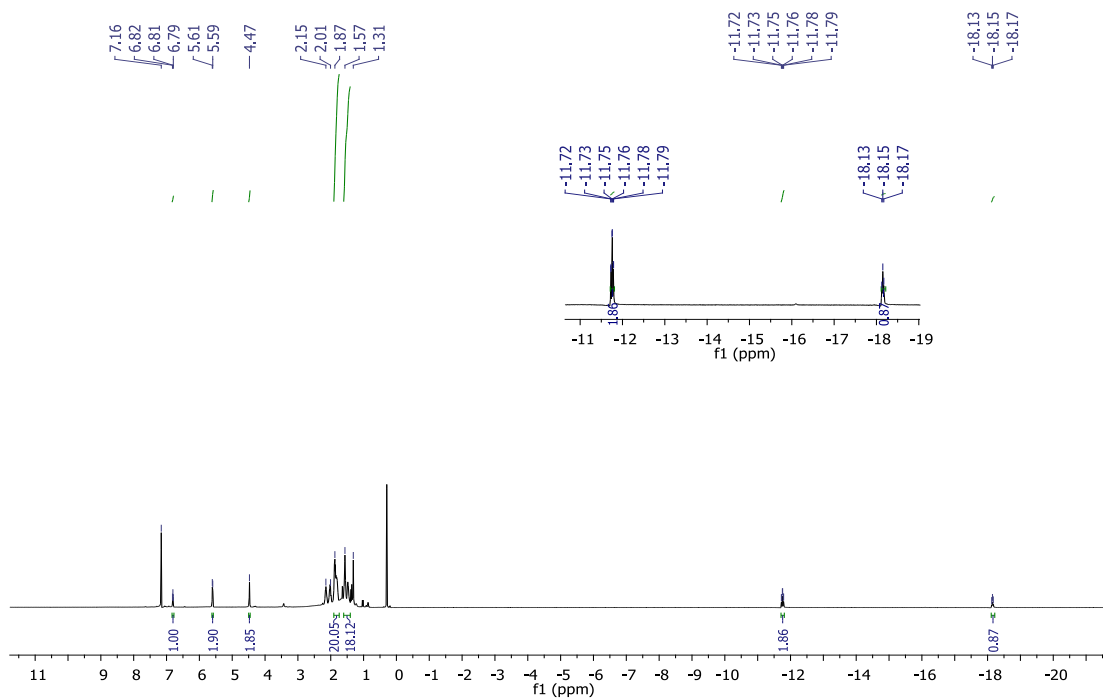

**Fig. 10.**  $^1\text{H}$  NMR spectrum of **4a** [ $\text{PN}^3\text{P}^{\text{cPe}}\text{IrH}_3$ ] (600 MHz,  $\text{C}_6\text{D}_6$ , 25 °C).

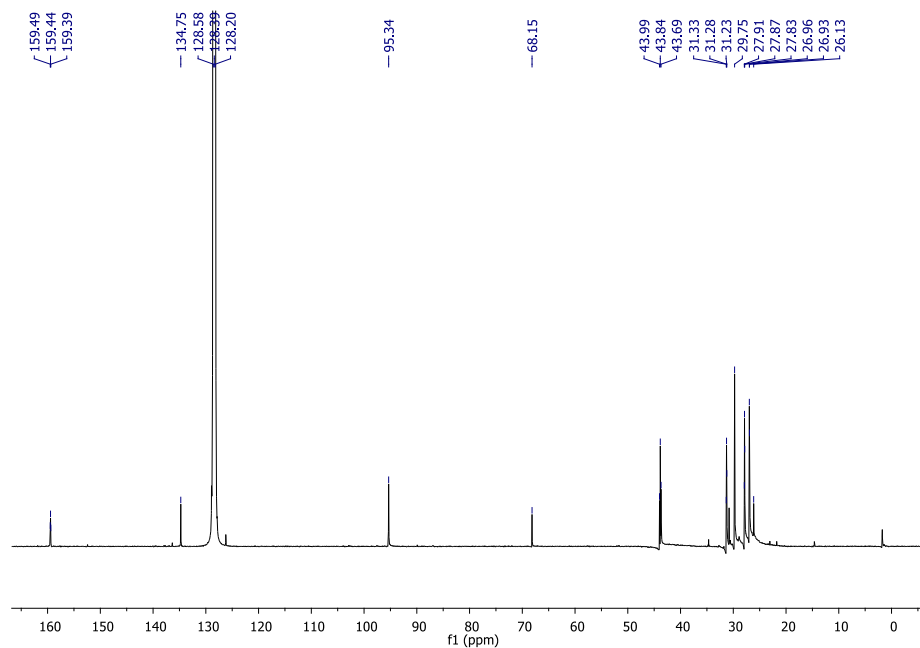

**Fig. 11.**  $^{13}\text{C}$  NMR spectrum of **4a** [ $\text{PN}^3\text{P}^{\text{cPe}}\text{IrH}_3$ ] (125MHz,  $\text{C}_6\text{D}_6$ , 25  $^\circ\text{C}$ ).

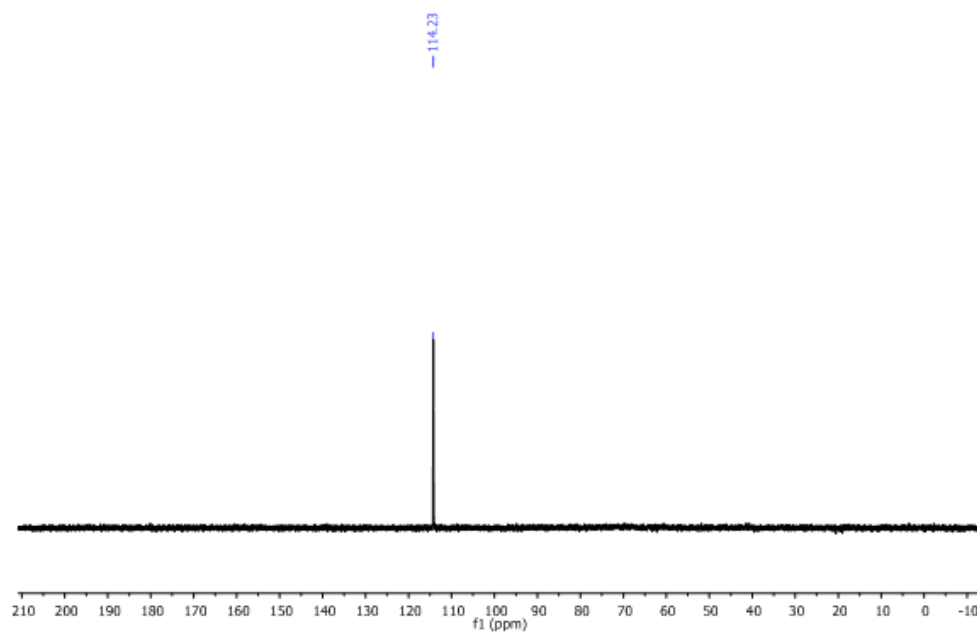

**Fig. 12.**  $^{31}\text{P}$  NMR spectrum of **4a** [ $\text{PN}^3\text{P}^{\text{cPe}}\text{IrH}_3$ ] (243 MHz,  $\text{C}_6\text{D}_6$ , 25  $^\circ\text{C}$ ).

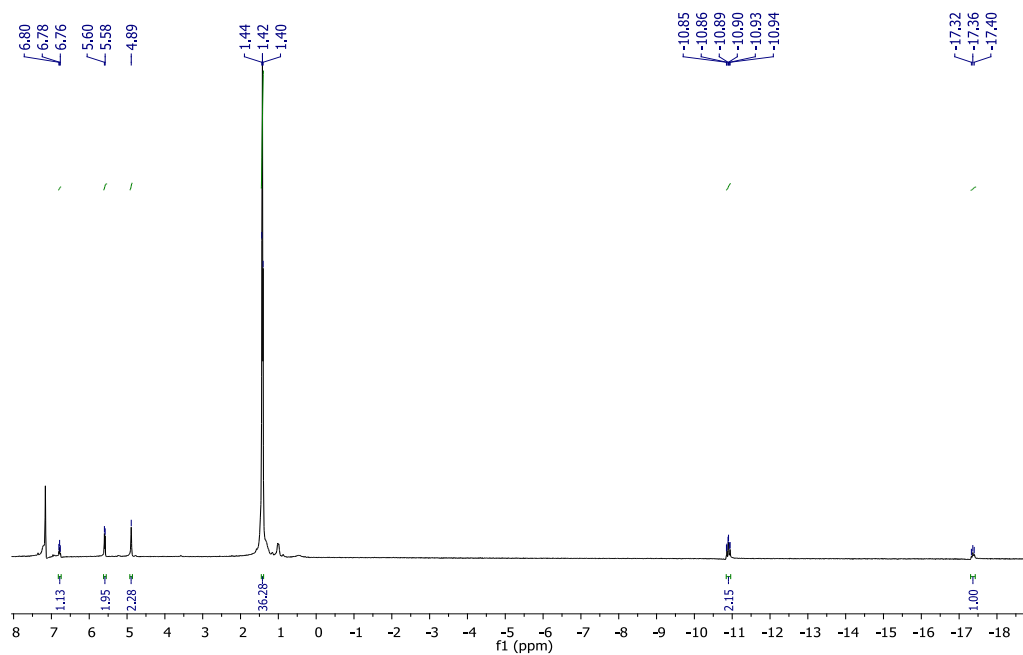

**Fig. 13.** <sup>1</sup>H NMR spectrum of **4b** [PN<sup>3</sup>P<sup>t</sup>BuIrH<sub>3</sub>] (400 MHz, C<sub>6</sub>D<sub>6</sub>, 25 °C).

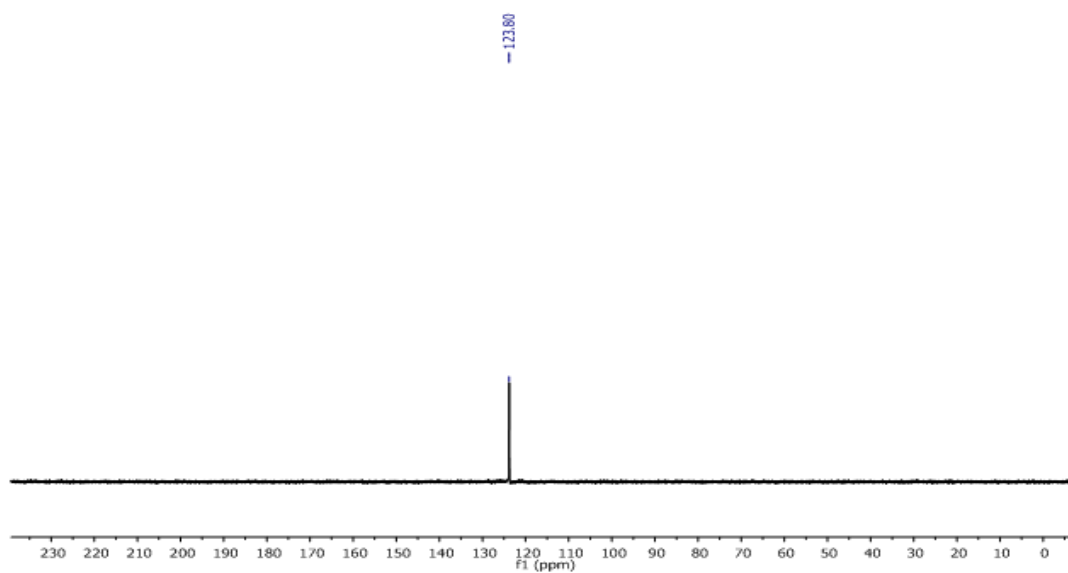

**Fig. 14.** <sup>31</sup>P NMR spectrum of **4b** [PN<sup>3</sup>P<sup>t</sup>BuIrH<sub>3</sub>] (162 MHz, C<sub>6</sub>D<sub>6</sub>, 25 °C).

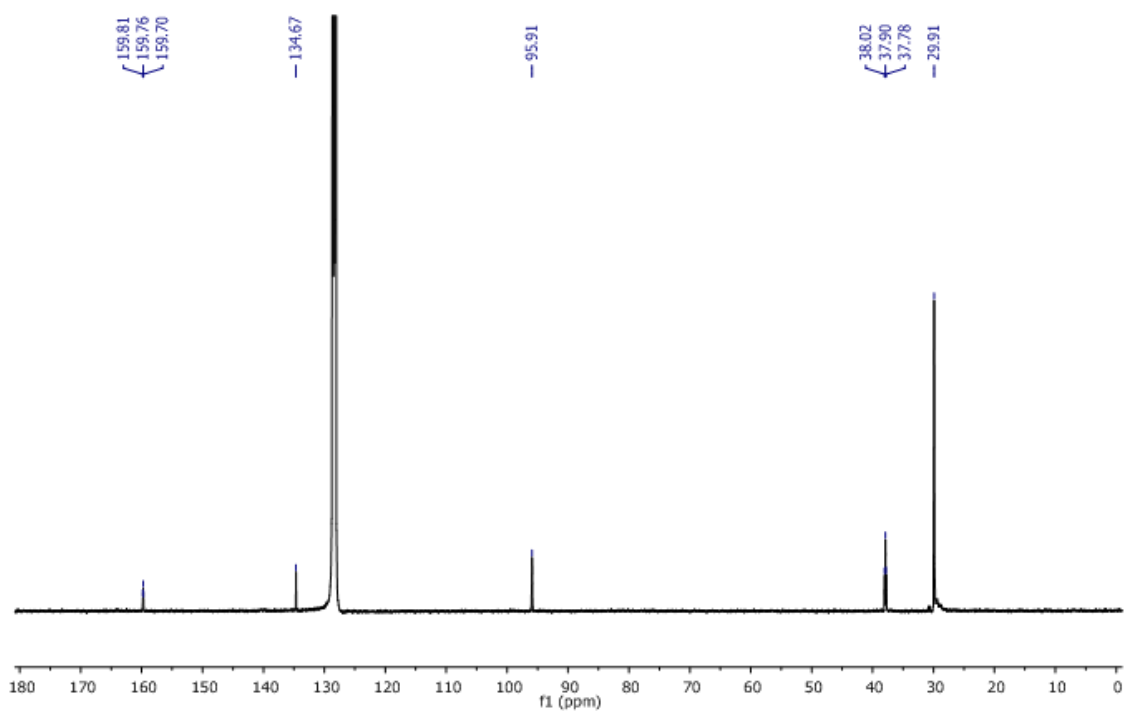

**Fig. 15.**  $^{13}\text{C}$  NMR spectrum of **4b** [ $\text{PN}^3\text{Pt}^{\text{tBu}}\text{IrH}_3$ ] (100MHz,  $\text{C}_6\text{D}_6$ , 25  $^\circ\text{C}$ ).

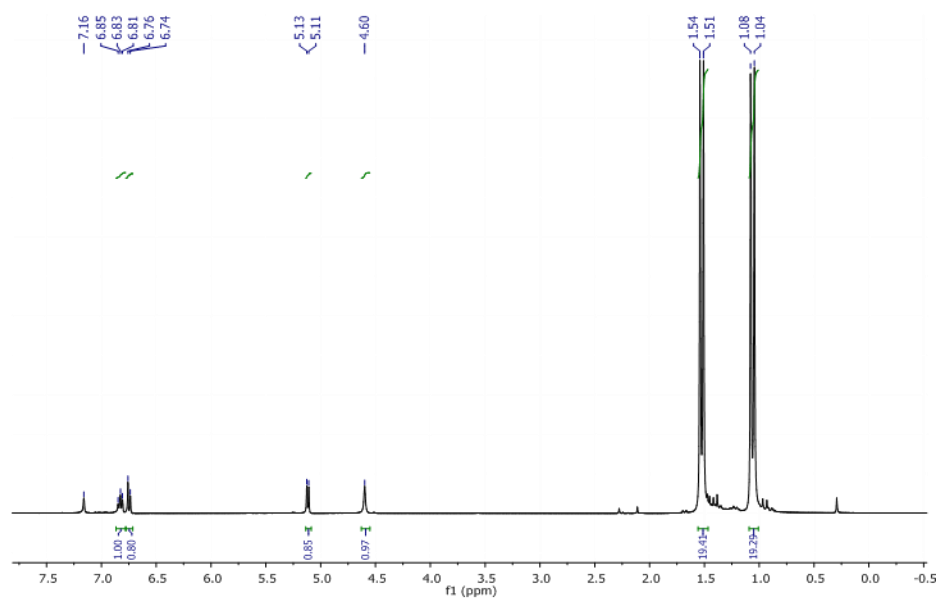

**Fig. 16.**  $^1\text{H}$  NMR spectrum of **5b** [ $\text{PN}^3\text{Pt}^{\text{tBu}}\text{IrCO}$ ] (I) complex (400 MHz,  $\text{C}_6\text{D}_6$ , 25  $^\circ\text{C}$ ).



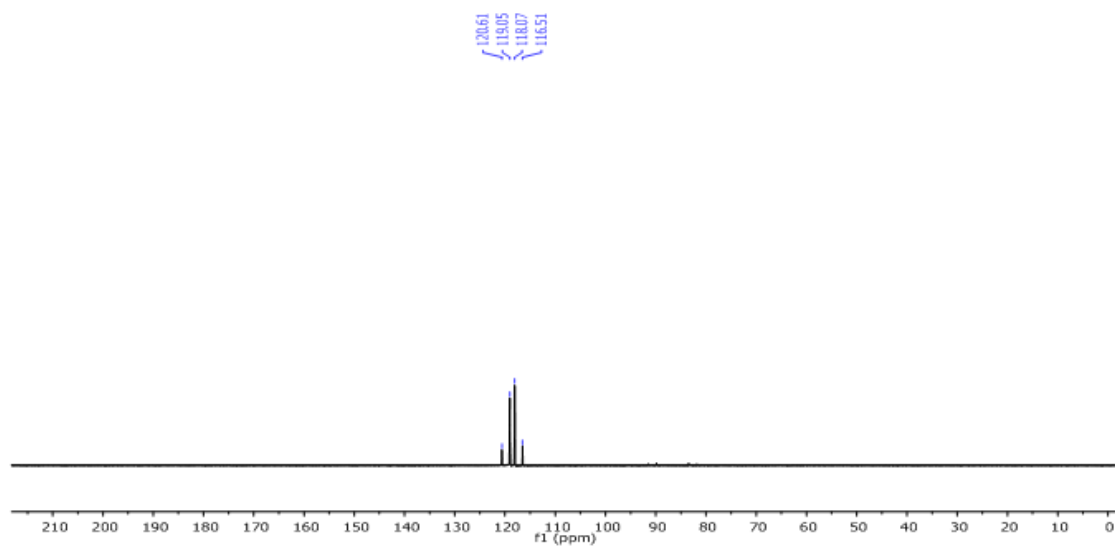

**Fig. 17.**  $^{31}\text{P}$  NMR spectrum of **5b**  $[\text{PN}^3\text{P}^{\text{tBu}}\text{IrCO}]$  (I) complex (162 MHz,  $\text{C}_6\text{D}_6$ , 25  $^\circ\text{C}$ ).

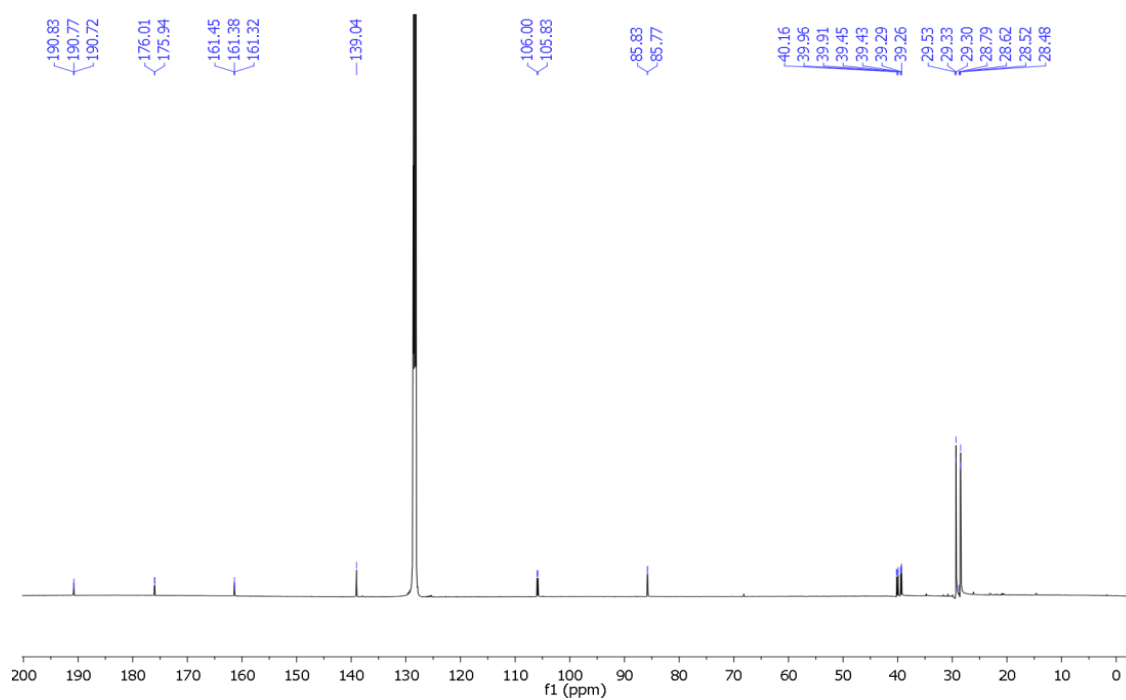

**Fig. 18.**  $^{13}\text{C}$  NMR spectrum of **5b**  $[\text{PN}^3\text{P}^{\text{tBu}}\text{IrCO}]$  (I) complex (125 MHz,  $\text{C}_6\text{D}_6$ , 25  $^\circ\text{C}$ ).

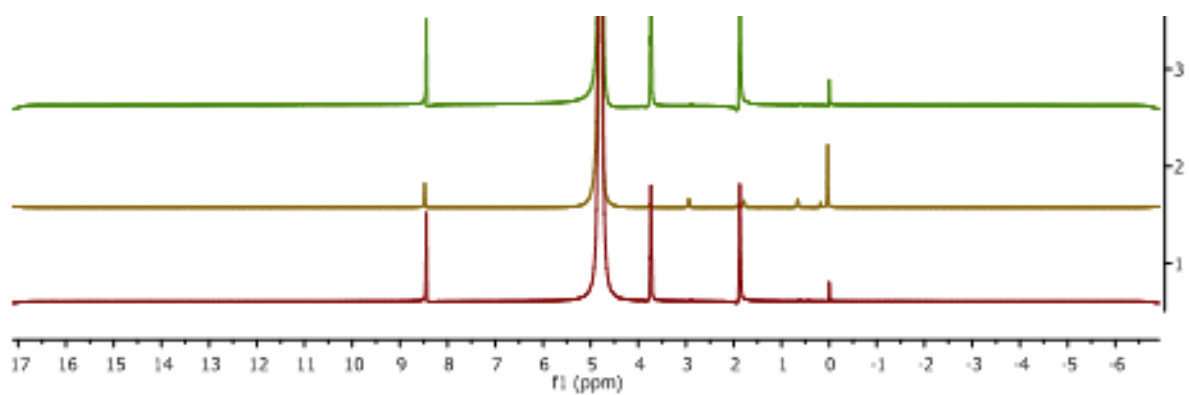

Fig. **19**. Selected  $^1\text{H}$  NMR spectrum of hydrogenation reaction mixture in  $\text{D}_2\text{O}$  (green line 3 represent entry 4 in table 1; brown line 2 represent entry 1 in table 1; red line 1 represent entry 5 in table 1) (400 MHz, 25  $^\circ\text{C}$ )

**S**Table1. Crystallographic Data for Iridium Complexes **2b**, **3b**, **4a** and **5b**.

| Entry                                                        | <b>2b</b>                                                         | <b>4a</b>                                                                                           | <b>3b</b>                                                       | <b>5b</b>                                                         |
|--------------------------------------------------------------|-------------------------------------------------------------------|-----------------------------------------------------------------------------------------------------|-----------------------------------------------------------------|-------------------------------------------------------------------|
| Formula                                                      | C <sub>21</sub> H <sub>43</sub> ClN <sub>3</sub> IrP <sub>2</sub> | C <sub>25</sub> H <sub>44</sub> N <sub>3</sub> P <sub>2</sub> Ir·3(C <sub>4</sub> H <sub>8</sub> O) | C <sub>21</sub> H <sub>42</sub> N <sub>3</sub> IrP <sub>2</sub> | C <sub>22</sub> H <sub>40</sub> N <sub>3</sub> IrP <sub>2</sub> O |
| Formula weight                                               | 627.21                                                            | 857.13                                                                                              | 590.75                                                          | 616.74                                                            |
| Crystal system                                               | Triclinic                                                         | Monoclinic                                                                                          | Monoclinic                                                      | Monoclinic                                                        |
| Space group                                                  | P-1                                                               | P2(1)/c                                                                                             | C2/c                                                            | C2/c                                                              |
| <i>a</i> (Å)                                                 | 14.7189(5)                                                        | 10.1942(8)                                                                                          | 30.0076(19)                                                     | 44.5757(9)                                                        |
| <i>b</i> (Å)                                                 | 14.7186(5)                                                        | 18.8062(14)                                                                                         | 12.9046(7)                                                      | 8.2230 (10)                                                       |
| <i>c</i> (Å)                                                 | 18.2416(6)                                                        | 21.1584(16)                                                                                         | 26.2920(14)                                                     | 33.2828(7)                                                        |
| $\alpha$ (deg)                                               | 72.7870(10)                                                       | 90                                                                                                  | 90                                                              | 90                                                                |
| $\beta$ (deg)                                                | 72.0540(10)                                                       | 102.736(2)                                                                                          | 99.263(4)                                                       | 108.629(2)                                                        |
| $\gamma$ (deg)                                               | 61.3420(10)                                                       | 90                                                                                                  | 90                                                              | 90                                                                |
| <i>V</i> (Å <sup>3</sup> )                                   | 3246.69(19)                                                       | 3956.6(5)                                                                                           | 10048.4(10)                                                     | 11560.5(4)                                                        |
| <i>Z</i>                                                     | 2                                                                 | 4                                                                                                   | 8                                                               | 16                                                                |
| <i>D</i> <sub>calcd</sub> (g/cm <sup>3</sup> )               | 1.282                                                             | 1.076                                                                                               | 1.458                                                           | 3.427                                                             |
| radiation ( $\lambda$ ), Å                                   | Cu K (1.54178)                                                    | Cu K (1.54178)                                                                                      | Cu K (1.54178)                                                  | Cu K (1.5406)                                                     |
| 2 $\theta$ range (°)                                         | 2.59 to 64.75                                                     | 3.18 to 72.49                                                                                       | 2.98 to 79.48                                                   | 3.33 to 25.00                                                     |
| $\mu$ (mm <sup>-1</sup> )                                    | 9.713                                                             | 7.578                                                                                               | 11.555                                                          | 4.746                                                             |
| <i>F</i> (000)                                               | 1254                                                              | 1752                                                                                                | 4112                                                            | 10400                                                             |
| reflns_number_total                                          | 10376                                                             | 7838                                                                                                | 69898                                                           | 80147                                                             |
| Reflns no gt                                                 | 8847                                                              | 7707                                                                                                | 8919                                                            | 10148                                                             |
| <i>R</i> (int)                                               | 0.0379                                                            | 0.0504                                                                                              | 0.0736                                                          | 0.0567                                                            |
| GOF                                                          | 1.019                                                             | 1.149                                                                                               | 0.925                                                           | 0.933                                                             |
| <i>R</i> <sub>1</sub> [ <i>I</i> > 2 $\sigma$ ( <i>I</i> )]  | 0.0348                                                            | 0.0303                                                                                              | 0.0652                                                          | 0.0360                                                            |
| <i>wR</i> <sub>2</sub> [ <i>I</i> > 2 $\sigma$ ( <i>I</i> )] | 0.1097                                                            | 0.1246                                                                                              | 0.1606                                                          | 0.0933                                                            |
| <i>R</i> <sub>1</sub> [all data]                             | 0.0421                                                            | 0.0307                                                                                              | 0.0708                                                          | 0.0399                                                            |
| <i>wR</i> <sub>2</sub> [all data]                            | 0.1315                                                            | 0.1246                                                                                              | 0.1655                                                          | 0.0959                                                            |
